# Supplementary material for: One more piece to SOLIDify our knowledge on the impact of SARS-CoV-2 in patients with cancer
Source: PubMed Central journal article supplement — Transl Lung Cancer Res. 2022 Feb;11(2):132–4. doi: 10.21037/tlcr-22-93 (PMC8902096; doi:10.21037/tlcr-22-93), 2022-02

## ICMJE DISCLOSURE FORM

Date: 22.02.2022

Your Name: Alfredo Addeo

Manuscript Title: One more piece to SOLIDify our knowledge on the impact of SARS-COV2 in patients with cancer

Manuscript number (if known: TLCR-22-93)

In the interest of transparency, we ask you to disclose all relationships/activities/interests listed below that are related to the content of your manuscript. "Related" means any relation with for-profit or not-for-profit third parties whose interests may be affected by the content of the manuscript. Disclosure represents a commitment to transparency and does not necessarily indicate a bias. If you are in doubt about whether to list a relationship/activity/interest, it is preferable that you do so.

The following questions apply to the author's relationships/activities/interests as they relate to the current manuscript only.

The author's relationships/activities/interests should be defined broadly. For example, if your manuscript pertains to the epidemiology of hypertension, you should declare all relationships with manufacturers of antihypertensive medication, even if that medication is not mentioned in the manuscript.

In item #1 below, report all support for the work reported in this manuscript without time limit. For all other items, the time frame for disclosure is the past 36 months.

|                                                    |                                                                                                                                                                         | Name all entities with whom you have this relationship or indicate none (add rows as needed) | Specifications/Comments (e.g., if payments were made to you or to your institution) |
|----------------------------------------------------|-------------------------------------------------------------------------------------------------------------------------------------------------------------------------|----------------------------------------------------------------------------------------------|-------------------------------------------------------------------------------------|
| Time frame: Since the initial planning of the work |                                                                                                                                                                         |                                                                                              |                                                                                     |
| 1                                                  | All support for the present manuscript (e.g., funding, provision of study materials, medical writing, article processing charges, etc.)<br>No time limit for this item. | ___ None                                                                                     |                                                                                     |
|                                                    |                                                                                                                                                                         |                                                                                              |                                                                                     |
|                                                    |                                                                                                                                                                         |                                                                                              |                                                                                     |
|                                                    |                                                                                                                                                                         |                                                                                              |                                                                                     |
|                                                    |                                                                                                                                                                         |                                                                                              |                                                                                     |
|                                                    |                                                                                                                                                                         |                                                                                              |                                                                                     |
|                                                    |                                                                                                                                                                         |                                                                                              |                                                                                     |
| Time frame: past 36 months                         |                                                                                                                                                                         |                                                                                              |                                                                                     |
| 2                                                  | Grants or contracts from any entity (if not indicated in item #1 above).                                                                                                | ___ None                                                                                     |                                                                                     |
|                                                    |                                                                                                                                                                         |                                                                                              |                                                                                     |
|                                                    |                                                                                                                                                                         |                                                                                              |                                                                                     |

|    |                                                                                                              |              |  |
|----|--------------------------------------------------------------------------------------------------------------|--------------|--|
| 3  | Royalties or licenses                                                                                        | ___ None     |  |
|    |                                                                                                              |              |  |
|    |                                                                                                              |              |  |
| 4  | Consulting fees                                                                                              | ___ None     |  |
|    |                                                                                                              |              |  |
|    |                                                                                                              |              |  |
| 5  | Payment or honoraria for lectures, presentations, speakers bureaus, manuscript writing or educational events | Astrazeneca, |  |
|    |                                                                                                              | Eli Lilly    |  |
|    |                                                                                                              | Amgen        |  |
|    |                                                                                                              |              |  |
|    |                                                                                                              |              |  |
| 6  | Payment for expert testimony                                                                                 | ___ None     |  |
|    |                                                                                                              |              |  |
|    |                                                                                                              |              |  |
| 7  | Support for attending meetings and/or travel                                                                 | ___ None     |  |
|    |                                                                                                              |              |  |
|    |                                                                                                              |              |  |
| 8  | Patents planned, issued or pending                                                                           | ___ None     |  |
|    |                                                                                                              |              |  |
|    |                                                                                                              |              |  |
| 9  | Participation on a Data Safety Monitoring Board or Advisory Board                                            | MSD          |  |
|    |                                                                                                              | Roche        |  |
|    |                                                                                                              | BMS          |  |
|    |                                                                                                              | Pfizer       |  |
|    |                                                                                                              | Novartis     |  |
|    |                                                                                                              | Eli Lilly    |  |
|    |                                                                                                              | Jansenn      |  |
|    |                                                                                                              | Sanofi       |  |
|    |                                                                                                              | Astellas     |  |
| 10 | Leadership or fiduciary role in other board, society, committee or advocacy group, paid or unpaid            | ___ None     |  |
|    |                                                                                                              |              |  |
|    |                                                                                                              |              |  |

|    |                                                                                  |                               |  |
|----|----------------------------------------------------------------------------------|-------------------------------|--|
| 11 | Stock or stock options                                                           | <input type="checkbox"/> None |  |
|    |                                                                                  |                               |  |
|    |                                                                                  |                               |  |
| 12 | Receipt of equipment, materials, drugs, medical writing, gifts or other services | <input type="checkbox"/> None |  |
|    |                                                                                  |                               |  |
|    |                                                                                  |                               |  |
| 13 | Other financial or nonfinancial interests                                        | <input type="checkbox"/> None |  |
|    |                                                                                  |                               |  |
|    |                                                                                  |                               |  |

**Please summarize the above conflict of interest in the following box:**

Dr Addeo reports personal fees from, MSD, Roche, BMS, Pfizer, Novartis, Eli Lilly, Amgen, Jansenn, Sanofi Astellas and AstraZeneca, outside the submitted work;

**Please place an "X" next to the following statement to indicate your agreement:**

I certify that I have answered every question and have not altered the wording of any of the questions on this form.

## ICMJE DISCLOSURE FORM

Date: 22.02.2022

Your Name: Alessio Cortellini

Manuscript Title: One more piece to SOLIDify our knowledge on the impact of SARS-COV2 in patients with cancer

Manuscript number (if known: TLCR-22-93)

In the interest of transparency, we ask you to disclose all relationships/activities/interests listed below that are related to the content of your manuscript. "Related" means any relation with for-profit or not-for-profit third parties whose interests may be affected by the content of the manuscript. Disclosure represents a commitment to transparency and does not necessarily indicate a bias. If you are in doubt about whether to list a relationship/activity/interest, it is preferable that you do so.

The following questions apply to the author's relationships/activities/interests as they relate to the current manuscript only.

The author's relationships/activities/interests should be defined broadly. For example, if your manuscript pertains to the epidemiology of hypertension, you should declare all relationships with manufacturers of antihypertensive medication, even if that medication is not mentioned in the manuscript.

In item #1 below, report all support for the work reported in this manuscript without time limit. For all other items, the time frame for disclosure is the past 36 months.

|                                                    |                                                                                                                                                                         | Name all entities with whom you have this relationship or indicate none (add rows as needed) | Specifications/Comments (e.g., if payments were made to you or to your institution) |
|----------------------------------------------------|-------------------------------------------------------------------------------------------------------------------------------------------------------------------------|----------------------------------------------------------------------------------------------|-------------------------------------------------------------------------------------|
| Time frame: Since the initial planning of the work |                                                                                                                                                                         |                                                                                              |                                                                                     |
| 1                                                  | All support for the present manuscript (e.g., funding, provision of study materials, medical writing, article processing charges, etc.)<br>No time limit for this item. | ___ None                                                                                     |                                                                                     |
|                                                    |                                                                                                                                                                         |                                                                                              |                                                                                     |
|                                                    |                                                                                                                                                                         |                                                                                              |                                                                                     |
|                                                    |                                                                                                                                                                         |                                                                                              |                                                                                     |
|                                                    |                                                                                                                                                                         |                                                                                              |                                                                                     |
|                                                    |                                                                                                                                                                         |                                                                                              |                                                                                     |
|                                                    |                                                                                                                                                                         |                                                                                              |                                                                                     |
| Time frame: past 36 months                         |                                                                                                                                                                         |                                                                                              |                                                                                     |
| 2                                                  | Grants or contracts from any entity (if not indicated in item #1 above).                                                                                                | ___ None                                                                                     |                                                                                     |
|                                                    |                                                                                                                                                                         |                                                                                              |                                                                                     |
|                                                    |                                                                                                                                                                         |                                                                                              |                                                                                     |
| 3                                                  | Royalties or licenses                                                                                                                                                   | ___ None                                                                                     |                                                                                     |

|    |                                                                                                              |              |  |
|----|--------------------------------------------------------------------------------------------------------------|--------------|--|
|    |                                                                                                              |              |  |
| 4  | Consulting fees                                                                                              | ___ None     |  |
|    |                                                                                                              |              |  |
| 5  | Payment or honoraria for lectures, presentations, speakers bureaus, manuscript writing or educational events | Astrazeneca, |  |
|    |                                                                                                              | EISAI        |  |
|    |                                                                                                              | Novartis     |  |
|    |                                                                                                              | MSD          |  |
|    |                                                                                                              | BMS          |  |
|    |                                                                                                              | Roche        |  |
|    |                                                                                                              |              |  |
|    |                                                                                                              |              |  |
| 6  | Payment for expert testimony                                                                                 | ___ None     |  |
|    |                                                                                                              |              |  |
| 7  | Support for attending meetings and/or travel                                                                 | ___ None     |  |
|    |                                                                                                              |              |  |
|    |                                                                                                              |              |  |
| 8  | Patents planned, issued or pending                                                                           | ___ None     |  |
|    |                                                                                                              |              |  |
|    |                                                                                                              |              |  |
| 9  | Participation on a Data Safety Monitoring Board or Advisory Board                                            | ___ None     |  |
| 10 | Leadership or fiduciary role in other board, society, committee or advocacy group, paid or unpaid            | ___ None     |  |
|    |                                                                                                              |              |  |
|    |                                                                                                              |              |  |
| 11 | Stock or stock options                                                                                       | ___ None     |  |
|    |                                                                                                              |              |  |
|    |                                                                                                              |              |  |
| 12 |                                                                                                              | ___ None     |  |

|    |                                                                                  |                               |  |
|----|----------------------------------------------------------------------------------|-------------------------------|--|
|    | Receipt of equipment, materials, drugs, medical writing, gifts or other services |                               |  |
| 13 | Other financial or nonfinancial interests                                        | <input type="checkbox"/> None |  |
|    |                                                                                  |                               |  |
|    |                                                                                  |                               |  |

**Please summarize the above conflict of interest in the following box:**

Dr Cortellini received speaker fees and grant consultancies from Astrazeneca, MSD, BMS, Roche, Novartis and EISAI, outside of the submitted work

**Please place an "X" next to the following statement to indicate your agreement:**

I certify that I have answered every question and have not altered the wording of any of the questions on this form.

## ICMJE DISCLOSURE FORM

Date: 21.02.22

Your Name: Giuseppe Luigi Banna

Manuscript Title: One more piece to make more SOLID our knowledge on the impact of SARS-COV2 in patients with cancer

Manuscript number (if known): TLCR-22-93

In the interest of transparency, we ask you to disclose all relationships/activities/interests listed below that are related to the content of your manuscript. "Related" means any relation with for-profit or not-for-profit third parties whose interests may be affected by the content of the manuscript. Disclosure represents a commitment to transparency and does not necessarily indicate a bias. If you are in doubt about whether to list a relationship/activity/interest, it is preferable that you do so.

The following questions apply to the author's relationships/activities/interests as they relate to the current manuscript only.

The author's relationships/activities/interests should be defined broadly. For example, if your manuscript pertains to the epidemiology of hypertension, you should declare all relationships with manufacturers of antihypertensive medication, even if that medication is not mentioned in the manuscript.

In item #1 below, report all support for the work reported in this manuscript without time limit. For all other items, the time frame for disclosure is the past 36 months.

|                                                           |                                                                                                                                                                                | Name all entities with whom you have this relationship or indicate none (add rows as needed) | Specifications/Comments (e.g., if payments were made to you or to your institution) |
|-----------------------------------------------------------|--------------------------------------------------------------------------------------------------------------------------------------------------------------------------------|----------------------------------------------------------------------------------------------|-------------------------------------------------------------------------------------|
| <b>Time frame: Since the initial planning of the work</b> |                                                                                                                                                                                |                                                                                              |                                                                                     |
| 1                                                         | All support for the present manuscript (e.g., funding, provision of study materials, medical writing, article processing charges, etc.)<br><b>No time limit for this item.</b> | _____ None                                                                                   |                                                                                     |
|                                                           |                                                                                                                                                                                |                                                                                              |                                                                                     |
|                                                           |                                                                                                                                                                                |                                                                                              |                                                                                     |
|                                                           |                                                                                                                                                                                |                                                                                              |                                                                                     |
|                                                           |                                                                                                                                                                                |                                                                                              |                                                                                     |
|                                                           |                                                                                                                                                                                |                                                                                              |                                                                                     |
| <b>Time frame: past 36 months</b>                         |                                                                                                                                                                                |                                                                                              |                                                                                     |
| 2                                                         | Grants or contracts from any entity (if not indicated in item #1 above).                                                                                                       | _____ None                                                                                   |                                                                                     |
|                                                           |                                                                                                                                                                                |                                                                                              |                                                                                     |
| 3                                                         | Royalties or licenses                                                                                                                                                          | _____ None                                                                                   |                                                                                     |
|                                                           |                                                                                                                                                                                |                                                                                              |                                                                                     |
| 4                                                         | Consulting fees                                                                                                                                                                | _____ None                                                                                   |                                                                                     |
|                                                           |                                                                                                                                                                                |                                                                                              |                                                                                     |

|    |                                                                                                              |                           |  |
|----|--------------------------------------------------------------------------------------------------------------|---------------------------|--|
| 5  | Payment or honoraria for lectures, presentations, speakers bureaus, manuscript writing or educational events | ___ AstraZeneca, Astellas |  |
| 6  | Payment for expert testimony                                                                                 | ___ None                  |  |
| 7  | Support for attending meetings and/or travel                                                                 | ___ None                  |  |
| 8  | Patents planned, issued or pending                                                                           | ___ None                  |  |
| 9  | Participation on a Data Safety Monitoring Board or Advisory Board                                            | ___ None                  |  |
| 10 | Leadership or fiduciary role in other board, society, committee or advocacy group, paid or unpaid            | ___ None                  |  |
| 11 | Stock or stock options                                                                                       | ___ None                  |  |
| 12 | Receipt of equipment, materials, drugs, medical writing, gifts or other services                             | ___ None                  |  |
| 13 | Other financial or non-financial interests                                                                   | ___ None                  |  |

**Please summarize the above conflict of interest in the following box:**

Dr. BANNA reports personal fees from Astellas and AstraZeneca, outside the submitted work;

**Please place an "X" next to the following statement to indicate your agreement:**

X  I certify that I have answered every question and have not altered the wording of any of the questions on this form.



Supplement: tlcr-11-02-132-coif.pdf [file tlcr-11-02-132-coif.pdf]
